1 To be submitted to: Applied and Environmental Microbiology

2

3 Reduced levels of membrane-bound alkaline phosphatase in

4 Vip3Aa-resistant *Heliothis virescens*

5

6 Daniel Pinos,<sup>a</sup> Maissa Chakroun,<sup>a,\*</sup> Anabel Millán-Leiva,<sup>a</sup> Juan Luis Jurat-Fuentes,<sup>b</sup>

7 Denis J. Wright,<sup>c</sup> Patricia Hernández-Martínez,<sup>a</sup> Juan Ferré<sup>a,#</sup>

8

9 <sup>a</sup>Instituto de Biotecnología y Biomedicina (BIOTECMED), Department of Genetics,  
10 Universitat de València, 46100 Burjassot, Spain

11 <sup>b</sup>Department of Entomology and Plant Pathology, University of Tennessee, Knoxville,  
12 TN 37996

13 <sup>c</sup>Department of Life Sciences, Imperial College London, Silwood Park Campus, Ascot,  
14 Berks SL5 7PY, UK

15

16

17 Keywords: *Bacillus thuringiensis*, insecticidal proteins, insect resistance, tobacco  
18 budworm

19

20 Running Title: Vip3Aa resistance in *H. virescens*

21

22 <sup>#</sup>Corresponding Author: Juan Ferré, [juan.ferre@uv.es](mailto:juan.ferre@uv.es)

23 <sup>\*</sup>Current address: Centre de Biotechnologie de Sfax, Sfax, Tunisia

24 **ABSTRACT**

25 The Vip3Aa insecticidal protein from *Bacillus thuringiensis* (Bt) is produced by specific  
26 transgenic corn and cotton varieties for efficient control of target lepidopteran pests. The  
27 main threat to this technology is the evolution of resistance in targeted insect pests, thus  
28 understanding the mechanistic basis of resistance is crucial to deploy the most appropriate  
29 strategies for resistance management. In this work, a laboratory-selected colony of  
30 *Heliothis virescens* (Vip-Sel) highly resistant to the Vip3Aa protein was used to test  
31 whether an alteration of membrane receptors in the insect midgut might explain the  
32 resistance phenotype. Binding of <sup>125</sup>I-labeled Vip3Aa to brush border membrane vesicles  
33 (BBMV) from 3rd instar larvae from Vip-Sel was not significantly different from binding  
34 in the reference susceptible colony. Interestingly, BBMV from Vip-Sel larvae show  
35 dramatically reduced levels of alkaline phosphatase activity, which was further confirmed  
36 by a strong down-regulation of the membrane-bound alkaline phosphatase 1 (*HvmALP1*)  
37 gene. However, its involvement as a receptor for the Vip3Aa protein was not supported  
38 by ligand blotting and viability assays with insect cells expressing *HvmALP1*. These data  
39 support that reduced alkaline phosphatase, previously observed in insect colonies  
40 resistant to Cry proteins from Bt, may also serve as an indirect marker that is not  
41 mechanistically involved in resistance to Vip3Aa.

42

43 **IMPORTANCE**

44 The Vip3Aa insecticidal protein remains the only lepidopteran-specific trait in transgenic  
45 Bt crops with no cases of field-evolved resistance. While laboratory-selected resistance  
46 to Vip3A has been reported elsewhere, the mechanism for resistance is unknown. Results  
47 in this work show lack of significant Vip3Aa binding alterations in resistant and reference  
48 colonies of *H. virescens*. These observations are in contrast to most cases of high levels

49 of resistance to insecticidal Bt proteins for which decreased binding is commonly  
50 detected. In addition, this study provides the first evidence of down-regulation of  
51 membrane bound alkaline phosphatase (mALP) associated with Vip3Aa resistance, a  
52 phenomenon commonly associated with resistance to Cry proteins from Bt. Results from  
53 this work suggest that mALP down-regulation may be a useful biomarker yet reject its  
54 direct participation in resistance to Vip3Aa.

## 55 INTRODUCTION

56 The polyphagous pest *Heliothis virescens* (L.) (Lepidoptera: Noctuidae) is well  
57 known for producing substantial economic losses, particularly in cotton production, due  
58 to its ability to evolve resistance to different synthetic control products, such as methyl  
59 parathion or pyrethroids (1,2). As an alternative approach, genetically modified crops  
60 expressing insecticidal genes from *Bacillus thuringiensis* (Bt crops) were introduced in  
61 1996 for the control of this and other pests. However, extensive use threatens their  
62 effectiveness and cases of field-evolved practical resistance have already been reported  
63 for some lepidopteran and coleopteran pests (3).

64 Gene pyramiding has been proposed as an effective strategy for insect resistance  
65 management in Bt crops (4). This approach consists of combined production of distinct  
66 insecticidal Bt proteins in the same plant, and its success heavily relies on the expressed  
67 proteins having distinct mode of action, commonly defined as not sharing binding sites  
68 in target tissues (5,6).

69 Although the mechanism of action and receptors for Cry proteins have been  
70 widely studied (7), little is known about the biochemical mechanisms that underlie the  
71 action of Vip3A proteins. Several studies have shown that Vip3A proteins do not share  
72 binding sites with Cry1 or Cry2 proteins, yet their damage to the midgut epithelium  
73 resembles Cry action (8-11). Supported by the lack of shared binding sites, transgenic  
74 corn and cotton varieties pyramided with Cry1, Cry2 and Vip3A genes are currently  
75 commercialized in several countries.

76 Knowledge of the biochemical and genetic level factors involved in resistance is  
77 crucial to design practices that delay the appearance of resistance or allow its rapid  
78 detection and ways to overcome it. The genetic potential to evolve resistance to Vip3A  
79 has already been shown in some laboratory-selected insect species such as *H. virescens*

80 (12), *Spodoptera litura* (13), *Helicoverpa armigera* and *Helicoverpa punctigera* (14), and  
81 *Spodoptera frugiperda* (15,16). However, the biochemical basis of resistance to Vip3A  
82 has only been studied in a laboratory-selected colony of *H. armigera*, for which alteration  
83 of the binding sites was found not to be the cause of resistance (17).

84 In the present study, we aimed to determine the biochemical basis of resistance in  
85 a Vip3A-resistant *H. virescens* colony. In a previous study with this colony (Vip-Sel),  
86 resistance was shown to be polygenic (18), and a transcriptomic analysis showed  
87 significant differential gene expression with 420 over-expressed and 1,569 under-  
88 expressed genes (19). Results herein support that Vip3Aa binding is not altered  
89 significantly in resistant compared to susceptible *H. virescens*, and demonstrate an  
90 association between Vip3A resistance and down-regulation of a membrane bound  
91 alkaline phosphatase (mALP). Considering that orthologues of this mALP are commonly  
92 down-regulated in Cry1-resistant lepidopteran pests (20-23), our results suggest that the  
93 potential use of mALP down-regulation as resistance marker may extend to resistance  
94 against Vip3A proteins.

95

96

## 97 **RESULTS**

### 98 **Vip3Aa binding to midgut brush border membrane vesicles (BBMV)**

99 In testing whether binding of Vip3Aa was altered in the Vip3A-resistant (Vip-Sel)  
100 compared to the reference susceptible (Vip-Unsel) colony, we measured binding of  
101 Vip3Aa labeled with <sup>125</sup>I to BBMV from the two colonies. Binding analyses showed  
102 specific Vip3Aa binding for BBMV from both colonies, with similar homologous  
103 competition curves (Figure 1, panel A). A high percentage of non-specific binding to the  
104 microtubule walls was detected (35-40% of the input labeled toxin), which accounted for  
105 most of the non-specific binding (binding that is not blocked by high concentrations of

106 unlabeled Vip3Aa competitor) observed in the competition curves. The  $K_d$  and  $R_t$  values  
107 estimated from the competition curves indicated that Vip3Aa binds with low affinity to a  
108 high number of binding sites in BBMV from *H. virescens* (Table 1). No significant  
109 differences ( $P > 0.05$ ) were found in these equilibrium binding parameters between the  
110 two *H. virescens* colonies, suggesting that binding alteration is not mechanistically related  
111 to Vip3Aa resistance in Vip-Sel.

112

### 113 **Reduced alkaline phosphatase (ALP) levels in the Vip-Sel colony**

114 As a preliminary step to the use of brush border membrane vesicles (BBMV) in  
115 binding studies, we determined the specific activities of two brush border membrane  
116 markers, alkaline phosphatase (ALP) and aminopeptidase-N (APN), in larval midgut  
117 homogenates and BBMV preparations from susceptible (Vip-Unsel) and Vip3A-resistant  
118 (Vip-Sel) *H. virescens* colonies (Figure 2). The specific APN activity in midgut  
119 homogenates from both colonies was around 12 mU/mg, while in the BBMV preparations  
120 it was around 70 mU/mg, indicating an enrichment of APN activity of around 5.8-fold.  
121 Importantly, no significant differences ( $P > 0.05$ ) in APN activity were observed between  
122 the Vip-Unsel and Vip-Sel colonies. For the Vip-Unsel colony, specific ALP activity was  
123 7.44 mU/mg in midgut homogenates and 42.5 mU/mg in the BBMV, with an enrichment  
124 of 5.8-fold for the BBMV preparation, in agreement with the value obtained for APN. In  
125 contrast, dramatically reduced ALP activity was detected in samples from the Vip-Sel  
126 colony (1.15 mU/mg in midgut homogenate and 1.88 mU/mg in BBMV). While  
127 unexpected, this observation is in line with reports of reduced ALP levels in Cry1-  
128 resistant lepidopteran species, including *H. virescens* (20-23). Consequently, we further  
129 explored the extremely reduced ALP activity in Vip-Sel to determine whether it was due  
130 to a loss of function or reduced gene expression.

131 Electrophoretic comparison of BBMV proteins from the two *H. virescens* colonies  
132 showed a protein band of ~66 kDa for the Vip-Unsel colony that was almost  
133 imperceptible in the BBMV from the Vip-Sel colony (Figure 3, panel A). Western  
134 blotting indicated the presence of ALP in the ~66 kDa protein band, and confirmed the  
135 highly reduced levels of this protein in the Vip-Sel colony (Figure 3, panel B). The  
136 composition of the ~66 kDa protein band and its relative abundance in the two *H.*  
137 *virescens* colonies were determined by liquid chromatography coupled to mass  
138 spectrometry (LC-MS) analysis. The spectra for the most abundant protein detected and  
139 identified in the ~66 kDa band matched to membrane-bound alkaline phosphatase  
140 (mALP) from *H. virescens* (Genbank Accession no. ABR88230). According to the  
141 exponentially modified protein abundance index (emPAI) expressing the proportional  
142 protein content in a protein mixture, the abundance ratio of mALP between Vip-Unsel  
143 and Vip-Sel was 22.7-fold.

144

145 To test if the reduced mALP protein levels in Vip-Sel were controlled at the  
146 transcriptional level, we performed real time quantitative PCR (RT-qPCR) with total  
147 RNA from the two colonies. Transcript levels for two *H. virescens* mALP genes,  
148 *HvmALP1* (accession number FJ416470.1) and *HvmALP2* (accession number  
149 FJ416471.1), were analyzed. Compared to insects from the Vip-Unsel colony, larvae  
150 from the Vip-Sel colony had significant (P-value < 0.05) 9-fold down-regulation of the  
151 *HvmALP1* gene, while transcript levels for *HvmALP2* were not different between colonies  
152 (Figure 3, panel C). These results support that reduced ALP enzyme activity in BBMV  
153 from Vip-Sel compared to Vip-Unsel is due to reduced expression of *HvmALP1* in the  
154 Vip-Sel colony.

155

## 156 **Ligand blotting**

157           Since *H. virescens* ALP was proposed to play a role in binding of Cry1 proteins  
158 to the midgut membrane (24), we used ligand blotting to test whether mALP was involved  
159 in Vip3Aa binding. Binding of Vip3Aa to blots of resolved BBMV proteins was detected  
160 with anti-Vip3Aa antisera. No differences in the Vip3Aa-binding band pattern were  
161 detected between both colonies, in agreement with the binding results with radiolabeled  
162 Vip3Aa. However, no Vip3Aa binding was observed at the mALP position (~ 66 kDa)  
163 (Figure 1, panel B).

164

## 165 **Transient expression of ALP in cells**

166           To further test the potential role of mALP as functional Vip3Aa receptor, we  
167 cloned and transiently expressed the *HvmALP* gene in cultured (Sf21) insect cells and  
168 performed cell viability tests after challenge with Vip3Aa. Transfection was successful,  
169 as transfected cells showed ~5-fold increased specific ALP activity compared with non-  
170 transfected cells or cells transfected with the empty plasmid (Figure 4, panel A).  
171 However, after a challenge with Vip3Aa, the viability of transfected cells was not  
172 significantly different ( $P > 0.05$ ) from that of the control cells (Figure 4, panel B),  
173 confirming that mALP does not serve as functional receptor for Vip3Aa during the  
174 toxicity process.

175

## 176 **DISCUSSION**

177           The use of resistant insect strains isolated from the field or selected in the  
178 laboratory has been a powerful tool to understand the biochemical and genetic bases of  
179 resistance to Bt insecticidal proteins. Many studies have found that the alteration of the  
180 membrane receptors is a common mechanism conferring high levels of resistance to Cry  
181 proteins (25-27). In the case of Cry1 proteins, an important body of literature identifies



182 the main receptors altered in association with resistance, including aminopeptidase N,  
183 ABC transporters, cadherins and membrane alkaline phosphatases (28,29). In contrast,  
184 three candidate receptors have been proposed for Vip3A proteins, including the  
185 *Spodoptera spp.* ribosomal protein S2 (30), the fibroblast growth factor receptor-like  
186 protein (31) and the scavenger receptor class C-like protein (32). However, the  
187 relationship between these proposed receptors and Vip3Aa resistance has not been  
188 established.

189 In the present work, we aimed to determine whether alteration of membrane  
190 receptors was the basis for the observed 2,040-fold resistance to Vip3Aa in a *H. virescens*  
191 laboratory colony. Results from binding assays with BBMV and radiolabeled Vip3Aa did  
192 not detect significant difference between the susceptible and resistant colonies,  
193 suggesting no involvement of binding site alteration in resistance. This conclusion was  
194 further supported by results from ligand blotting, where no differences between the  
195 binding patterns of Vip3Aa to BBMV proteins from the two colonies was observed.  
196 Similar results were reported for a laboratory-selected Vip3A-resistant colony of *H.*  
197 *armigera* (17), suggesting that high levels and narrow spectrum Vip3A resistance may  
198 develop by mechanisms other than alteration of Vip3Aa binding sites.

199 Despite the fact that differences in binding were not found between the two *H.*  
200 *virescens* colonies, a dramatic reduction in the ALP enzymatic activity was detected in  
201 midgut samples from the resistant compared to susceptible colony. Western blot and RT-  
202 qPCR analyses showed that the decreased activity was due to a reduction in the amount  
203 of mALP protein, which was controlled at the transcriptional level. Importantly, only one  
204 of the ALP isoforms (*HvmALP1*) appeared down-regulated, while transcript levels for the  
205 *HvmALP2* isoform were not different between colonies. Taken together, these results  
206 support the hypothesis that reduced expression of the *HvmALP1* isoform is associated

207 with Vip3Aa resistance in the Vip-Sel colony. Down-regulation or reduced levels of  
208 mALP in the midgut membrane have been observed as a common phenomenon in several  
209 Cry-resistant insects such as resistance to Cry1Ac in *H. virescens* (24), *Helicoverpa zea*  
210 (20), *Plutella xylostella* (21), and *Helicoverpa armigera* (23), to Cry1F in *S. frugiperda*  
211 (22), to Cry1C in *Spodoptera litura* (33), and even in *Aedes aegypti* resistant to a Bt susbp.  
212 *israeliensis* (Bti) (34). The fact that Cry1Ac and Cry1C have different binding sites (35)  
213 suggests that the role of ALP down-regulation in resistance may not be related to reduced  
214 Cry binding. In agreement with this hypothesis, reduced ALP levels were associated with  
215 resistance but Vip3Aa binding was not detected in Vip-Sel. In addition, susceptibility of  
216 Sf21 cells expressing HvmALP1 was not significantly different to Vip3Aa, supporting  
217 that ALP is not a functional receptor for Vip3Aa in *H. virescens*. However, gene silencing  
218 experiments provide evidence that ALPs are somehow involved in the intoxication  
219 process of Cry1, Cry2 and Cry11 proteins in several insect species (36-41).

220 In a Cry1Ac-resistant colony of *P. xylostella*, altered expression of different genes  
221 (including the *PxmALP*) was reported to be *trans*-regulated by up-regulation of a  
222 mitogen-activated protein kinase, which was linked to resistance (21). Similar *trans*-  
223 regulation of genes involved in resistance to Bt has also been observed for APN in  
224 *Trichoplusia ni* resistant to Cry1Ac (42) and *Ostrinia furnacalis* resistant to Cry1Ab (43),  
225 and for both APN and an ABCC transporter in *Bombyx mori* resistant to Cry1Ab (44).  
226 Further research should test the involvement of this control mechanism in down-  
227 regulation of *mALP* in Bt-resistant colonies.

228 The data in this study provides for the first time evidence that reduced levels of  
229 mALP are associated with Vip3Aa resistance. Considering that orthologues of this *mALP*  
230 are commonly down-regulated in Cry1-resistant lepidopteran pests (23), our results

231 suggest that the potential use of *mALP* down-regulation as resistance marker may extend  
232 to resistance against Vip3A proteins.

233

## 234 **MATERIALS AND METHODS**

### 235 **Insects**

236 Two colonies of *H. virescens* originated from the same field population collected  
237 in Arkansas (USA) were used in this study: Vip-Sel (Vip3Aa-resistant) and Vip-Unsel  
238 (Vip3Aa susceptible). The process of selection of the Vip-Sel colony with Vip3Aa has  
239 been previously described (12,18). After 13 generations of selection, the LC<sub>50</sub> of the Vip-  
240 Sel colony was 2,300 µg ml<sup>-1</sup>, representing a 2,040-fold resistance ratio relative to the  
241 control Vip-Unsel colony. Both colonies were reared at the Imperial College London,  
242 Silwood Park campus (UK), and frozen larvae were sent for analysis to the University of  
243 Valencia (Spain).

244

### 245 **BBMV preparation and enzyme activity assays**

246 Brush border membrane vesicles (BBMV) from 3<sup>rd</sup> instar *H. virescens* larval  
247 midguts from Vip-Sel and Vip-Unsel colonies were prepared according to the differential  
248 magnesium precipitation method (45). Isolated BBMV were flash frozen in liquid  
249 nitrogen and kept at -80°C until used. The protein concentration of the BBMV  
250 preparations was determined by the method of Bradford using bovine serum albumin  
251 (BSA) as a standard (46).

252 Alkaline phosphatase (ALP) and leucine aminopeptidase (APN) activities were  
253 used as brush border membrane enzymatic markers to determine the quality of the BBMV  
254 preparations (47). Specific ALP activity was determined by chromogenic detection of *p*-  
255 nitrophenyl phosphate (PNPP) substrate hydrolysis into *p*-nitrophenol, and specific APN

256 activity was detected by hydrolysis of L-Leu-*p*-nitroanilide substrate into *p*-nitroanilide.  
257 In both cases, chromogenic variation was measured on 1 µg of either BBMV or midgut  
258 homogenate at 405 nm (Infinite m200, Tecan, Mannedorf, Switzerland). Two different  
259 batches of BBMV were used and all enzymatic activity assays were performed in  
260 triplicates. Means values for enzyme activities from Vip-Unsel and Vip-Sel were  
261 compared by Student's *t*-test at 5% level of significance.

262 For measuring specific ALP enzymatic activity in cultured Sf21 cells, a 1.6 ml  
263 suspension of each cell type (non-transfected, transfected with empty plasmid, and  
264 transfected with ALP) was used. Culture cells were centrifuged, washed twice with 300  
265 µl of phosphate buffered saline (PBS) and then resuspended in 50 µl of PBS. Protein  
266 concentration was determined by the method of Bradford and specific ALP activity  
267 measured as above.

268

### 269 **Vip3Aa protein expression and purification**

270 The Vip3Aa16 (Vip3Aa) protein (NCBI accession No. AAW65132) was  
271 overexpressed in recombinant *Escherichia coli* BL21 carrying the *vip3Aa16* gene. Protein  
272 expression and lysis was carried out following the conditions described elsewhere (48).  
273 Soluble Vip3Aa in the cell lysate was purified by two different methodologies. For  
274 binding and cell viability assays, Vip3Aa was partially purified by isoelectric point  
275 precipitation (IPP), activated with trypsin treatment and further purified by anion-  
276 exchange chromatography, as previously described (11). For ligand assays, affinity  
277 chromatography purification was carried out using a HiTrap chelating HP column (GE  
278 Healthcare) and then activated with trypsin, as described (11).

279

### 280 **Vip3Aa labeling and binding experiments**

281 Purified Vip3Aa activated protein (25 µg) was labeled with 0.5 mCi of <sup>125</sup>I using  
282 the chloramine T method (11). The labeled protein was separated from the excess of free  
283 <sup>125</sup>I in a PD10 desalting column (GE Healthcare Life Sciences, United Kingdom) and the  
284 purity of the <sup>125</sup>I-labeled Vip3Aa was checked by autoradiography. The specific activity  
285 of the labeled protein was 2.2 mCi/mg.

286 Binding assays were performed as described elsewhere (11). Prior to being used,  
287 BBMV were centrifuged and resuspended in binding buffer (20 mM Tris, 150 mM NaCl,  
288 1 mM MnCl<sub>2</sub>, pH 7.4, 0,04% Blocking reagent from Sigma Aldrich). Competition  
289 binding experiments were conducted by incubating 1.4 µg of BBMV protein with 0.65  
290 nM <sup>125</sup>I-Vip3Aa in a final volume of 0.1 ml of binding buffer for 90 min at 25°C in the  
291 presence of increasing amounts of unlabeled Vip3Aa. After incubation, samples were  
292 centrifuged at 16,000 x g for 10 min and the pellet was washed once with 500 µl of cold  
293 binding buffer. Radioactivity retained in the pellet was measured in a model 2480  
294 WIZARD<sup>2</sup> gamma counter. Data from the competition experiments were analyzed to  
295 determine equilibrium binding parameters, dissociation constant ( $K_d$ ) and concentration  
296 of binding sites ( $R_t$ ) using the LIGAND software (49).

297

### 298 **Western and ligand blotting**

299 For the detection of ALP proteins in BBMV by Western blotting, BBMV (20 µg)  
300 were suspended in ice-cold PBS and heat denatured before separation on a SDS-10%  
301 PAGE gel. The resolved BBMV proteins were transferred to a nitrocellulose filter  
302 (Protran 0.45 µm NC, GE Healthcare) using a BioRad Mini Trans-Blot system at 4°C in  
303 blotting buffer (39 mM Glycine, 48 mM Tris-HCl, 0.037% SDS, 10% methanol, pH 8.5)  
304 for 1 h at constant voltage (100 V). After transfer, the nitrocellulose filter was blocked in  
305 blocking buffer (PBS, 0.1% Tween 20, 5% skimmed milk powder) overnight at 4°C. After

306 blocking and washing with PBST (PBS, 0.1% Tween 20) three times (5 min each),  
307 incubation with primary antibody against the membrane-bound form of ALP from  
308 *Anopheles gambiae* (generously provided by Dr. M. Adang, University of Georgia, USA)  
309 was performed for 90 min at a 1:5,000 dilution at room temperature (RT). The membrane  
310 was then washed with PBST three times for 5 min each and then incubated with secondary  
311 antibody (goat anti-rabbit conjugated to horseradish peroxidase [HRP] at a 1:10,000  
312 dilution) for 1h at RT. After being washed with PBST three times for 5 min each, the  
313 membrane was developed using enhanced chemiluminescence (ECL Prime Western  
314 Blotting detection reagent, GE Healthcare) in an ImageQuant LAS 4000 (GE Healthcare),  
315 according to the manufacturer's instructions.

316 Ligand blotting for the detection of BBMV proteins binding Vip3Aa protein was  
317 performed with BBMV proteins resolved and immobilized as described above for  
318 Western blotting. The nitrocellulose membrane was blocked for 1 h at 4 °C in blocking  
319 buffer (5% skimmed milk), and after three washes for 5 min each with PBST buffer, it  
320 was incubated overnight at 4 °C with blocking buffer (1% skimmed milk) supplemented  
321 with affinity chromatography-purified Vip3Aa at a final concentration of 4 µg/ml. After  
322 washing with PBST three times for 5 min each, the membrane was incubated with  
323 primary antibody against Vip3Aa at a 1:5,000 dilution for 1 h at RT. After three washing  
324 steps with PBST (5 min each), membranes were incubated with secondary antibody (goat  
325 anti-rabbit conjugated to HRP) for 1 h at RT. Upon washing three times (5 min each) with  
326 PBST, the membrane was developed as described for Western blotting.

327

### 328 **Proteomic analysis**

329 After resolving BBMV proteins from Vip-Sel and Vip-Unsel colonies by SDS-  
330 10% PAGE, the gel was stained with Coomassie blue (Thermo Scientific™). The band

331 corresponding to the expected molecular weight of ALP (~ 66 kDa) was cut out and  
332 subjected to analysis by nano-electron spray ionization (nano-ESI) followed by tandem  
333 mass spectrometry (qQTOF) in a 5600 TripleTOF (ABSCIEX) system. Results were  
334 analyzed with ProteinPilot v5.0 software and the relative amount of the proteins detected  
335 was estimated using the exponentially modified protein abundance index (emPAI) as  
336 described elsewhere (50).

337

### 338 **RT-qPCR**

339 Relative expression levels for *HvmALP1* and *HvmALP2* isoforms (accession numbers  
340 FJ416470 and FJ416471, respectively) were determined by reverse transcription  
341 quantitative polymerase-chain reaction (RT-qPCR). For this purpose, total RNA of  
342 dissected midguts from both colonies (Vip-Unsel and Vip-Sel) was isolated using  
343 RNeasy (Qiagen, Crawfordsville, IN) according to the manufacturer's protocol. Each  
344 RNA (1 µg) was reverse-transcribed to cDNA using random hexamers and oligo (dT) by  
345 following the instructions provided in the Prime-Script RT Reagent Kit (Perfect Real  
346 Time from TaKaRa Bio Inc., Otsu Shiga, Japan). RT-qPCR was carried out in a  
347 StepOnePlus Real-Time PCR system (Applied Biosystems, Foster City, CA). Reactions  
348 were performed using 5× HOT FIREpol EVAGreen qPCR Mix Plus (ROX) from Solis  
349 BioDyne (Tartu, Estonia) in a total reaction volume of 25 µl. Specific primers for  
350 *HvmALP1*, *HvmALP2* and *Rps18* (endogenous control) genes were as described  
351 elsewhere (23). The REST MCS software was used for gene expression analysis (51).

352

### 353 **Expression vector construction**

354 The full-length *HvmALP1* transcript was amplified from cDNA of *H. virescens*  
355 larvae and cloned into pET30a as described elsewhere (52). Purified plasmid DNA was

356 digested with *EcoRI* and *NotI* to excise the full-length sequence and ligate it in frame into  
357 *EcoRI-NotI* sites of the pIZT/V5His vector (Invitrogen), to generate the  
358 pIZT/V5His/*HvmALP1* construct. Ligation products were transformed into *E. coli* strain  
359 DH5 $\alpha$  and transformants checked for correct insertion by sequencing (University of  
360 Tennessee Sequencing Facility). Purified plasmid was used to transform *E. coli* strain  
361 DH10 $\beta$  and liquid cultures of LB medium supplemented with Zeocin (25 $\mu$ g/ml) were  
362 used to amplify the vector. To purify the plasmids for transfection, the NucleoSpin $\text{\textcircled{R}}$   
363 Plasmid kit (Macherey-Nagel, Düren, Germany) was used. Double digestion with *EcoRI*  
364 and *NotI* (which cleaved the full length *HvmALP1* insert) and 1% agarose gel  
365 electrophoresis were performed to check plasmid and/or insert integrity. The  
366 concentration of plasmid DNA was measured with a Thermo Scientific $\text{\textsuperscript{TM}}$  Nanodrop $\text{\textsuperscript{TM}}$   
367 2000 Spectrophotometer.

368

### 369 **Transient expression of *HvmALP1* in Sf21 cells**

370 Cultured Sf21 insect cells, originally derived from *S. frugiperda*, were maintained  
371 in 25 cm $^2$  tissue culture flasks (T25 flasks, Nunc) at 25 $^{\circ}$ C with 4 ml of Gibco $\text{\textcircled{R}}$  Grace's  
372 Medium (1x) (Life Technologies $\text{\textsuperscript{TM}}$ , Paisley, UK) supplemented with 10% heat-  
373 inactivated fetal bovine serum (FBS).

374 For transient expression, cells were seeded on 12-well plates with the same  
375 medium without FBS at *ca.* 70% confluency and transfected with 0.5  $\mu$ g of the  
376 pIZT/V5His/*HvmALP1* or pIZT/V5His plasmid using Cellfectin $\text{\textcircled{R}}$  II Reagent  
377 (Invitrogen), following manufacturer's instructions. Five hours post-transfection, the  
378 medium was replaced with fresh medium containing 10% FBS. After 24 hours, cells were  
379 examined using a confocal microscope (Olympus, FV1000MPE, Tokyo, Japan) equipped  
380 with the appropriate filter for green fluorescent protein (GFP) detection as transfection



381 marker. The enzymatic activity of alkaline phosphatase was then measured as explained  
382 above.

383

#### 384 **Cell viability assays**

385 Viability of transfected Sf21 cells exposed for 24 hours to Vip3Aa was measured  
386 using the MTT (3-[4,5-dimethylthiazol-2-yl]-2,5-diphenyltetrazolium bromide) assay.  
387 Briefly, cells (100  $\mu$ l per well) were transferred to 96-well ELISA plates (flat bottom) and  
388 incubated at 25°C for at least 45 min. Then, 10  $\mu$ l of trypsin-activated Vip3Aa toxin was  
389 added to each well at a final concentration of 300  $\mu$ g/ml. As negative and positive  
390 controls, 10  $\mu$ l of Tris buffer (Tris 20 mM, NaCl 150 mM, pH 9) and 10  $\mu$ l of 2% Triton  
391 X-100 were used, respectively. After 24 hours of incubation at 25°C, cell viability was  
392 assessed by applying 20  $\mu$ l of CellTiter 96® AQueous One Solution Reagent (Promega,  
393 Madison WI) to each well and incubating for 2 h at 25°C. Absorbance was measured at  
394 490 nm (Infinite m200, Tecan, Mannedorf, Switzerland). The percentage of viable cells  
395 was obtained as described elsewhere (53). Mean values in the transfected cells against  
396 the non-transfected cells were compared by Student's *t*-test at 5% level of significance.

397

398

#### 399 **ACKNOWLEDGMENTS**

400 This research was supported by the Spanish Ministry of Science, Innovation and  
401 Universities (grant no. RTI2018-095204-B-C21). D.P. is recipient of a PhD grant from  
402 the Spanish Ministry of Science, Innovation and Universities (grant ref. FPU15/05652).  
403 Support for JJJ-F was provided by the NC246 Multistate Hatch project from the USDA  
404 National Institute for Food and Agriculture (NIFA). The proteomic analysis was  
405 performed at the Proteomics Facility of the Servei Central de Suport a la Investigació

406 Experimental (SCSIE) at the Universitat de València (Valencia, Spain) that belongs to  
407 ProteoRed, PRB2-ISCII, supported by grant PT13/0001, of the PE I+D+I 2013-2016,  
408 funded by ISCII and FEDERPT13/0001.  
409

410    **REFERENCES**

- 411    1.    Wolfenbarger DA, Bodegas PR, Flores R. 1981. Development of resistance in *Heliothis* spp. in the  
412       Americas, Australia, Africa, and Asia. *Bull Entomol Soc Am* 27:181-185.
- 413    2.    Terán-Vargas AP. 1996. Insecticide resistance of tobacco budworm in Southern Tamaulipas  
414       Mexico. Proceedings of the Beltwide Cotton Conference, 9-12 January 1996, Nashville, TN.  
415       National Cotton Council of America, Memphis TN. pp. 784-786.
- 416    3.    Tabashnik BE, Carrière Y. 2019. Global patterns of resistance to Bt crops highlighting Pink  
417       Bollworm in the United States, China, and India. *J Econ Entomol* 112:2513-2523.
- 418    4.    Roush, R.T. 1997. Bt-transgenic crops: Just another pretty insecticide or a chance for a new start  
419       in resistance management? *Pesticide Sci* 51:328-334.
- 420    5.    Moar WJ, Anilkumar KJ. 2007. Plant science: the power of the pyramid. *Science* 318:1561-1562
- 421    6.    Carrière Y, Crickmore N, Tabashnik BE. 2015. Optimizing pyramided transgenic Bt crops for  
422       sustainable pest management. *Nat Biotechnol* 33:161-168
- 423    7.    Adang, M., Crickmore, N. and Jurat-Fuentes, J.L. (2014), 'Diversity of *Bacillus thuringiensis*  
424       crystal toxins and mechanism of action', in Dhadialla, T.S. and Gill, S. (Eds.) *Advances in Insect*  
425       *Physiology Vol. 47: Insect Midgut and Insecticidal Proteins*. San Diego, CA: Academic Press, 39-  
426       87.
- 427    8.    Lee MK, Miles P, Chen J. 2006. Brush border membrane binding properties of *Bacillus*  
428       *thuringiensis* Vip3A toxin to *Heliothis virescens* and *Helicoverpa zea* midguts. *Biochem Biophys*  
429       *Res Commun* 339:1043-1047
- 430    9.    Sena JAD, Hernández-Rodríguez CS, Ferré J. 2009. Interaction of *Bacillus thuringiensis* Cry1 and  
431       Vip3A proteins with *Spodoptera frugiperda* midgut binding sites. *Appl Environ Microbiol*  
432       75:2236-2237
- 433    10. Gouffon C, Van Vliet A, Van Rie J, Jansens S, Jurat-Fuentes JL. 2011. Binding sites for *Bacillus*  
434       *thuringiensis* Cry2Ae toxin on heliothine brush border membrane vesicles are not shared with  
435       Cry1A, Cry1F, or Vip3A toxin. *Appl Environ Microbiol* 77:3182-3188
- 436    11. Chakroun M, Ferré J. 2014. *In vivo* and *in vitro* binding of Vip3Aa to *Spodoptera frugiperda*  
437       midgut and characterization of binding sites by <sup>125</sup>I radiolabeling. *Appl Environ Microbiol*  
438       80:6258-6265

- 439 12. Pickett, B. 2009. Studies on resistance to vegetative (Vip3A) and crystal (Cry1A) insecticide toxin  
440 of *Bacillus thuringiensis* in *Heliothis virescens* (Fabricius). Ph.D Thesis, Imperial College London,  
441 London
- 442 13. Barkhade UP, Thakare AS. 2010. Protease mediated resistance mechanism to *Cry1C* and *Vip3A* in  
443 *Spodoptera litura*. Egypt Acad J Biolog Sci 3:43-50.
- 444 14. Mahon RJ, Downes SJ, James B. 2012. Vip3A resistance alleles exist at high levels in Australian  
445 targets before release of cotton expressing this toxin. PLoS ONE 7:e39192.
- 446 15. Bernardi O, Bernardi D, Horikoshi RJ, Okuma DM, Miraldo LL, Faretto J, Medeiros FC, Burd  
447 T, Omoto C. 2016. Selection and characterization of resistance to the Vip3Aa20 protein  
448 from *Bacillus thuringiensis* in *Spodoptera frugiperda*. Pest Manag Sci 72:1794-1802.
- 449 16. Yang F, Morsello S, Head GP, Sansone C, Huang F, Gilreath RT, Kerns DL. 2018. F<sub>2</sub> screen,  
450 inheritance and cross-resistance of field-derived Vip3A resistance in *Spodoptera*  
451 *frugiperda* (Lepidoptera: Noctuidae) collected from Louisiana, USA. Pest Manag Sci 74:1769-  
452 1778.
- 453 17. Chakroun M, Banyuls N, Walsh T, Downes S, James B, Ferré J. 2016. Characterization of the  
454 resistance to Vip3Aa in *Helicoverpa armigera* from Australia and the role of midgut processing  
455 and receptor binding. Sci Rep 6:24311.
- 456 18. Pickett BR, Gulzar A, Ferré J, Wright DJ. 2017. *Bacillus thuringiensis* Vip3Aa toxin resistance in  
457 *Heliothis virescens* (Lepidoptera: Noctuidae). Appl Environ Microbiol 83:e03506-16.
- 458 19. Ayra-Pardo C, Ochagavía ME, Raymond B, Gulzar A, Rodríguez-Cabrera L, Rodríguez de la Nova  
459 C, Morán-Bertot I, Terauchi R, Yoshida K, Matsumura H, Téllez-Rodríguez P, Hernández-  
460 Hernández D, Borrás-Hidalgo O, Wright DJ. 2019. HT-SuperSAGE of the gut tissue of a Vip3Aa-  
461 resistant *Heliothis virescens* (Lepidoptera: Noctuidae) strain provides insights into the basis of  
462 resistance. Insect Sci 26:479-498.
- 463 20. Caccia, S., Moar, W.J., Chandrashekhar, J., Oppert, C., Anilkumar, K.J., Jurat-Fuentes, J.L. and  
464 Ferre, J. (2012), 'Association of Cry1Ac toxin resistance in *Helicoverpa zea* (Boddie) with  
465 increased alkaline phosphatase levels in the midgut lumen', Appl Environ Microbiol 78:5690-5698.
- 466 21. Guo, Z., Kang, S., Chen, D., Wu, Q., Wang, S., Xie, W., Zhu, X., Baxter, S.W., Zhou, X., Jurat-  
467 Fuentes, J.L. and Zhang, Y. (2015), 'MAPK signaling pathway alters expression of midgut ALP

- 468 and ABCC genes and causes resistance to *Bacillus thuringiensis* Cry1Ac toxin in diamondback  
469 moth', PLoS Genet 11:e1005124.
- 470 22. Jakka SRK, Gong L, Hasler J, Banerjee R, Sheets JJ, Narva K, Blanco CA, Jurat-Fuentes JL. 2016.  
471 Field-evolved Mode 1 resistance of the fall armyworm to transgenic Cry1Fa-expressing corn  
472 associated with reduced Cry1Fa toxin binding and midgut alkaline phosphatase expression. Appl  
473 Environ Microbiol 82:1023-1034.
- 474 23. Jurat-Fuentes JL, Karumbaiah L, Jakka SRK, Ning C, Liu C, Wu K, Jackson J, Gould F, Blanco  
475 CA, Portilla M, Perera OP, Adang M. 2011. Reduced levels of membrane-bound alkaline  
476 phosphatase are common to lepidopteran strains resistant to Cry toxins from *Bacillus thuringiensis*.  
477 PLoS One 6:e17606.
- 478 24. Jurat-Fuentes JL, Adang MJ. 2004. Characterization of a Cry1Ac-receptor alkaline phosphatase in  
479 susceptible and resistant *Heliothis virescens* larvae. Eur J Biochem 271:3127-3135.
- 480 25. Ferré J, Van Rie J. 2002. Biochemistry and genetics of insect resistance to *Bacillus thuringiensis*.  
481 Annu Rev Entomol 47:501-533.
- 482 26. Ferré J, Van Rie J, MacIntosh SC. 2008. Insecticidal genetically modified crops and insect  
483 resistance management (IRM), p 41–86. In Romeis J, Shelton AM, Kennedy GG (ed), Integration  
484 of insect-resistant genetically modified crops within IPM programs. Springer Science Business  
485 Media BV, Dordrecht, Netherlands.
- 486 27. Peterson B, Bezuidenhout CC, Van den Berg J. 2017. An overview of mechanisms of Cry toxin  
487 resistance in lepidopteran insects. J Econ Entomol 110:362-377.
- 488 28. Pigott CR, Ellar DJ. 2007. Role of receptors in *Bacillus thuringiensis* crystal toxin activity.  
489 Microbiol Mol Biol Rev 71:255-281.
- 490 29. Sato R, Adegawa S, Li X, Tanaka S, Endo H. 2019. Function and role of ATP-Binding Cassette  
491 Transporters as receptors for 3D-Cry toxins. Toxins 11: doi:10.3390/toxins11020124.
- 492 30. Singh G, Sachdev B, Sharma N, Seth R, Bhatnagar RK. 2010. Interaction of *Bacillus thuringiensis*  
493 vegetative insecticidal protein with Ribosomal S2 protein triggers larvicidal activity in *Spodoptera*  
494 *frugiperda*. Appl Environ Microbiol 76:7202-7209.
- 495 31. Jiang K, Hou X, Han L, Tan T, Cao Z, Cai J. 2018. Fibroblast growth factor receptor, a novel  
496 receptor for vegetative insecticidal protein Vip3Aa. Toxins. 10, 546.

- 497 32. Jiang K, Hou X, Tan T, Cao Z, Mei S, Yan B, Chang J, Han L, Zhao D, Cai J. 2018. Scavenger  
498 receptor-C acts as a receptor for *Bacillus thuringiensis* vegetative insecticidal protein Vip3Aa and  
499 mediates the internalization of Vip3Aa via endocytosis. PLoS Pathog 14:e1007347.
- 500 33. Gong L, Wang H, Qi J, Han L, Hu M, Jurat-Fuentes JL. 2015. Homologs to Cry toxin receptor  
501 genes in a *de novo* transcriptome and their altered expression in resistant *Spodoptera litura* larvae.  
502 J Invertebr Pathol 129, 1-6.
- 503 34. Tetreau G, Bayyareddy K, Jones CM, Stalinski R, Riaz MA, Paris M, David J, Adang MJ, Després  
504 L. 2012. Larval midgut modifications associated with *Bti* resistance in the yellow fever mosquito  
505 using proteomic and transcriptomic approaches. BMC Genom 13:248.
- 506 35. Jakka SRK, Ferré J, Jurat-Fuentes JL. 2015. Cry toxin binding sites and their use in strategies to  
507 delay resistance evolution. In Soberón, M., Gao, Y. and Bravo, A. (Eds.) Bt Resistance -  
508 Characterization and Strategies for GM Crops Producing *Bacillus thuringiensis* Toxins. Boston  
509 (MA), USA: CAB International.
- 510 36. Ren X, Hu H, Jiang W, Ma X, Ma Y, Li G, Ma Y. 2018. Three GPI-anchored alkaline  
511 phosphatases are involved in the intoxication of Cry1Ca toxin to *Spodoptera exigua* larvae. J  
512 Invertebr Pathol 151:32-40.
- 513 37. Yuan X, Zhao M, Wei J, Zhang W, Wang B, Khaing M, Liang G. 2017. New insights on the role  
514 of alkaline phosphatase 2 from *Spodoptera exigua* (Hübner) in the action mechanism of Bt toxin  
515 Cry2Aa. J Insect Physiol 98:101-107.
- 516 38. Zhao M, Yuan X, Wei J, Zhang W, Wang B, Khaing M, Liang G. 2017. Functional roles of  
517 cadherin, aminopeptidase-N and alkaline phosphatase from *Helicoverpa armigera* (Hübner) in the  
518 action mechanism of *Bacillus thuringiensis* Cry2Aa. Sci Rep 7:46555.
- 519 39. Chen J, Aimanova K, Gill SS. 2017. Functional characterization of *Aedes aegypti* alkaline  
520 phosphatase ALP1 involved in the toxicity of Cry toxins from *Bacillus thuringiensis* subsp.  
521 *israelensis* and *jegathesan*. Peptides 98:78-85.
- 522 40. Wei J, Zhang M, Liang G, Li X. 2019. Alkaline phosphatase 2 is a functional receptor of Cry1Ac  
523 but not Cry2Ab in *Helicoverpa zea*. Insect Mol Biol 28:372-379.

- 524 41. Qiu L, Wang P, Wu T, Li B, Wang X, Lei C, Lin Y, Zhao J, Ma W. 2018. Downregulation of *Chilo*  
525 *suppressalis* alkaline phosphatase genes associated with resistance to three transgenic *Bacillus*  
526 *thuringiensis* rice lines. *Insect Mol Biol* 27:83-89.
- 527 42. Tiewsir K, Wang P. 2011. Differential alteration of two aminopeptidases N associated with  
528 resistance to *Bacillus thuringiensis* toxin Cry1Ac in cabbage looper. *Proc Natl Acad Sci USA*  
529 108:14037-14042.
- 530 43. Coates BS, Sumerford DV, Siegfried BD, Hellmich RL, Abel CA. 2013. Unlinked genetic loci  
531 control the reduced transcription of aminopeptidase N 1 and 3 in the European corn borer and  
532 determine tolerance to *Bacillus thuringiensis* Cry1Ab toxin. *Insect Biochem Mol Biol* 43:1152-  
533 1160.
- 534 44. Chen Y, Li M, Islam I, You L, Wang Y, Li Z, Ling L, Zeng B, Xu J, Huang Y, Tan A. 2014.  
535 Allelic-specific expression in relation to *Bombyx mori* resistance to Bt toxin. *Insect Biochem Mol*  
536 *Biol* 54:53-60.
- 537 45. Wolfersberger M, Luethy P, Maurer A, Parenti P, Sacchi FV, Giordana B, Hanozet GM. 1987.  
538 Preparation and partial characterization of amino acid transporting brush border membrane vesicles  
539 from the larval midgut of the cabbage butterfly (*Pieris brassicae*). *Comp Biochem Physiol* 86:301-  
540 308.
- 541 46. Bradford MM. 1976. A rapid and sensitive method for the quantitation of microgram quantities of  
542 protein utilizing the principle of protein-dye binding. *Anal Biochem* 72:248-254.
- 543 47. Hernández CS, Rodrigo A, Ferré J. 2004. Lyophilization of lepidopteran midguts: a preserving  
544 method for *Bacillus thuringiensis* toxin binding studies. *J Invertebr Pathol* 85:182-187.
- 545 48. Abdelkefi-Mesrati L, Rouis S, Sellami S, Jaoua S. 2009. *Prays oleae* midgut putative receptor of  
546 *Bacillus thuringiensis* vegetative insecticidal protein Vip3LB differs from that of Cry1Ac toxin.  
547 *Mol Biol* 43:15-19.
- 548 49. Munson PJ, Rodbard D. 1980. Ligand: a versatile computerized approach for characterization of  
549 ligand-binding systems. *Anal Biochem* 107:220-239.
- 550 50. Ishihama Y, Oda Y, Tabata T, Sato T, Nagasu T, Rappsilber J, Mann M. 2005. Exponentially  
551 modified protein abundance index (emPAI) for estimation of absolute protein amount in  
552 proteomics by the number of sequenced peptides per protein. *Mol Cell Proteomics* 4:1265-1272.

- 553 51. Pfaffl MW, Horgan GW, Dempfle L. 2002. Relative expression software tool (REST) for group-  
554 wise comparison and statistical analysis of relative expression results in real-time PCR. *Nucleic*  
555 *Acids Res* 30: e36.
- 556 52. Perera OP, Willis JD, Adang MJ, Jurat-Fuentes JL. 2009. Cloning and characterization of the  
557 Cry1Ac-binding alkaline phosphatase (HvALP) from *Heliothis virescens*. *Insect Biochem Mol*  
558 *Biol* 39: 294-302.
- 559 53. Martínez-Solís M, Pinos D, Endo H, Portugal L, Sato R, Ferré J, Herrero S, Hernández-Martínez  
560 P. 2018. Role of *Bacillus thuringiensis* Cry1A toxins domains in the binding to the ABCC2  
561 receptor from *Spodoptera exigua*. *Insect Biochem Mol Biol* 101:47-56.

562

563



564

565 **Table 1.** Equilibrium *Kd* (dissociation constant) and *Rt* (concentration of binding sites)

566 binding parameters estimated from Vip3Aa homologous competition assays with BBMV

567 from resistant (Vip-Sel) and susceptible (Vip-Unsel) *H. virescens* insects.

568

| Strain      | Mean $\pm$ SEM <sup>a</sup> |                                  |
|-------------|-----------------------------|----------------------------------|
|             | <i>Kd</i> (nM)              | <i>Rt</i> (pmol/mg) <sup>b</sup> |
| Susceptible | 138 $\pm$ 18                | 443 $\pm$ 66                     |
| Resistant   | 161 $\pm$ 34                | 443 $\pm$ 109                    |

569

570 <sup>a</sup> Values are the mean of two replicates.

571 <sup>b</sup> Values are expressed in picomoles per milligram of BBMV protein.

572

573

574

575

576

577

## FIGURES

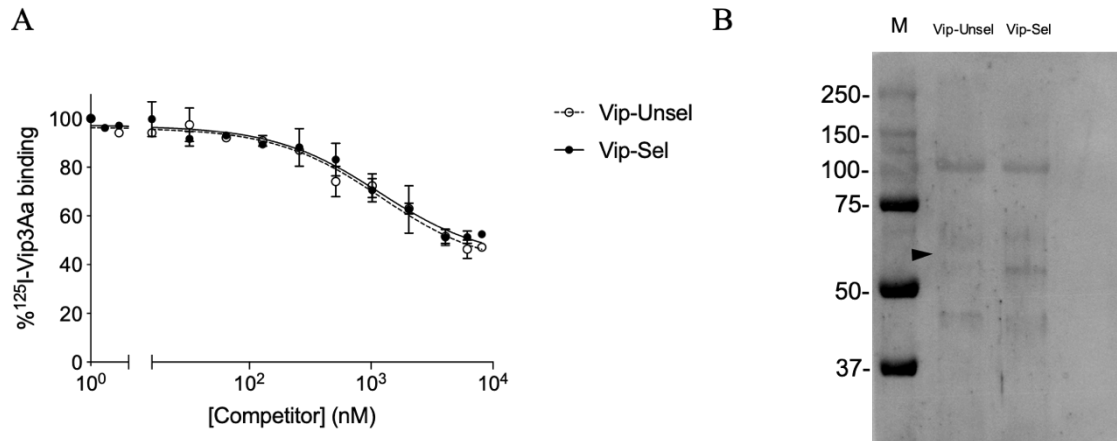

578

579

580

581 **Figure 1.** Analysis of the binding of BBMV from Vip-Unsel and Vip-Sel colonies of *H.*

582 *virescens* to Vip3Aa. **A)** Competition binding assays of BBMV from the two colonies

583 with  $^{125}\text{I}$ -Vip3Aa, using increasing concentrations of unlabeled Vip3Aa as competitor.

584 Each data point represents the mean of two replicates ( $\pm$  SEM). **B)** Ligand blot performed

585 with Vip3Aa against BBMV from Vip-Unsel and Vip-Sel colonies. Lane M: Protein

586 marker (molecular weight in kDa). Black arrow indicates expected molecular weight of

587 mALP (*ca.* 66 kDa).

588

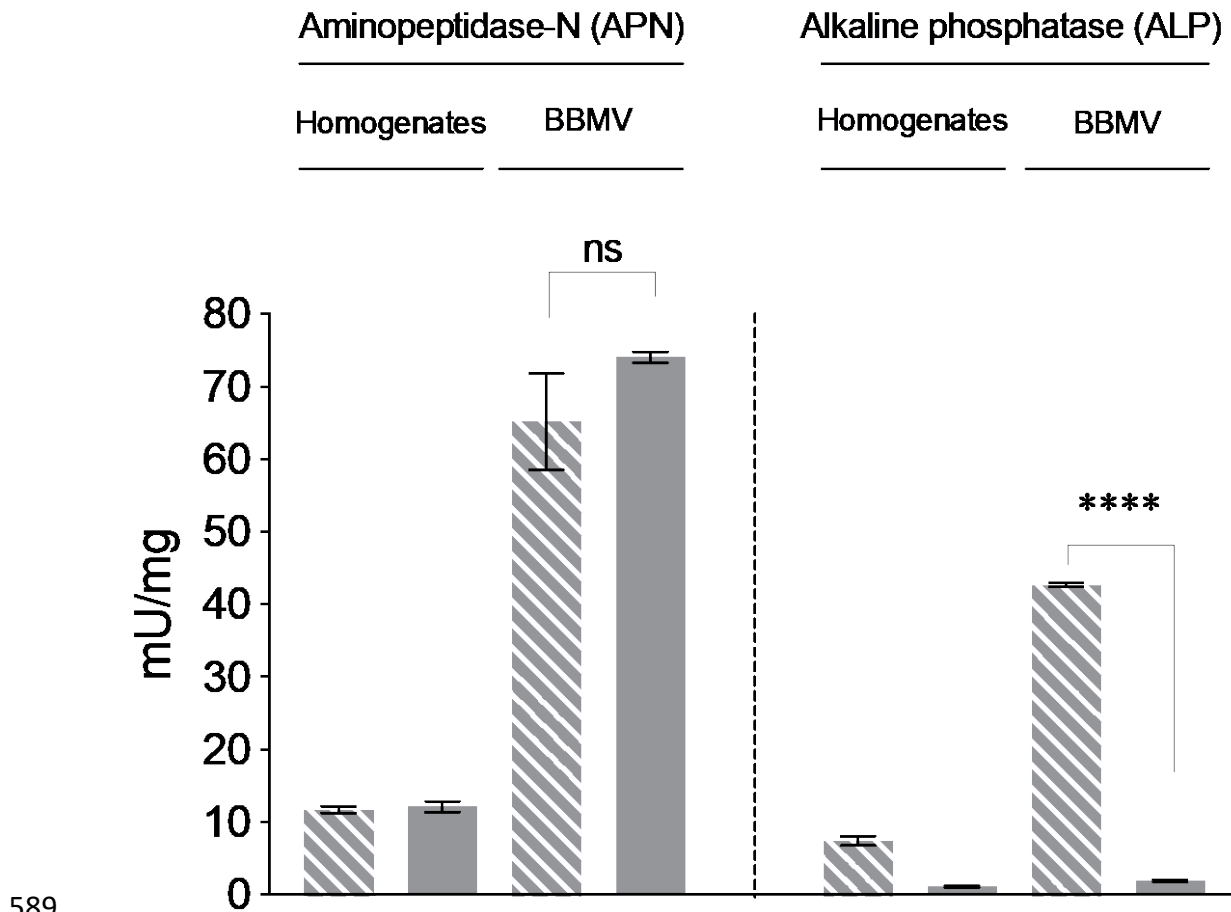

589

590

591 **Figure 2.** Enzymatic activities in homogenates and BBMVs from the two colonies of *H.*

592 *virescens*. (Dashed-grey bars: Vip-Unsel, grey bars: Vip-Sel). Each bar represents the

593 mean of three replicates ( $\pm$  SEM). Asterisks represent significant difference (Student's *t*

594 test,  $P < 0.0001$ ).

595

596

597

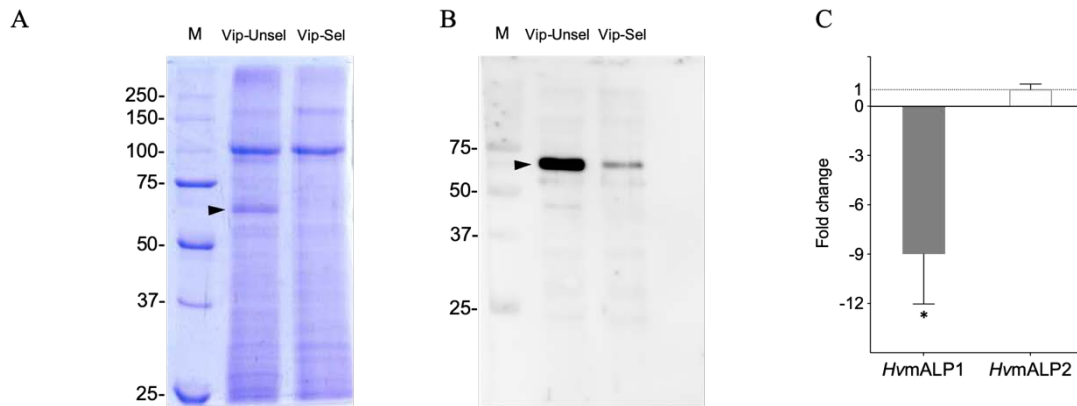

598

599

600 **Figure 3.** Analysis of membrane ALP levels in the susceptible (Vip-Unsel) and resistant  
601 (Vip-Sel) colonies of *H. virescens*. **A)** Protein gel electrophoresis (SDS-PAGE) of BBMV  
602 from the two colonies. **B)** Western blot performed with anti-ALP antibody against BBMV  
603 from the two colonies. Black arrow indicates mALP (*ca.* 66 kDa). Lane M: Protein  
604 marker (molecular weight in kDa). **C)** Membrane ALP expression levels in Vip-Sel  
605 colony using transcript levels in Vip-Unsel colony as a reference. Fold-changes  
606 calculated by REST-MCS Software. Bars represent the mean of three independent  
607 experiments ( $\pm$  SD, \*  $P < 0.05$ ).

608

609  
610

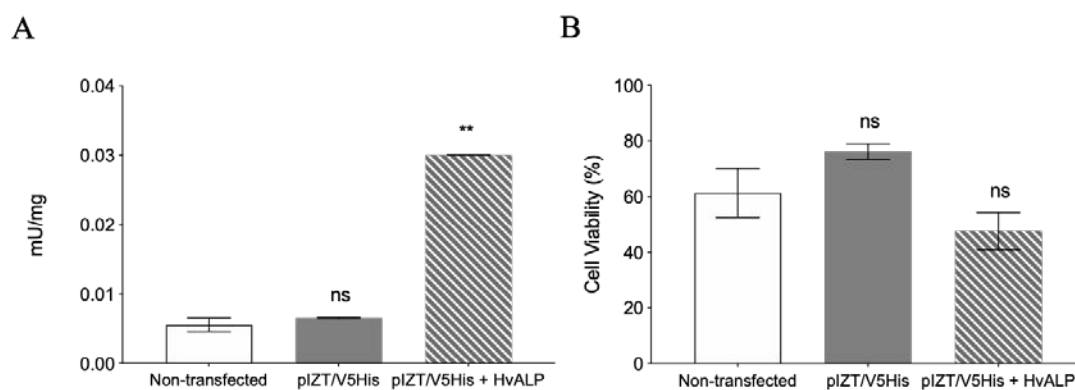

611

612

613 **Figure 4.** Specific ALP enzymatic activity and viability assays of Sf21 cells producing  
614 the HvmALP1 isoform. **A)** Alkaline phosphatase enzymatic activity on non-transfected  
615 cells (empty bars), cells transfected with empty plasmid (grey bars) and plasmid with  
616 *HvmALP1* (dashed-grey bars). **B)** Cell viability after 24 hours of Vip3Aa intoxication on  
617 the same three cell types. Each value represents the mean ( $\pm$  SEM). Means were compared  
618 by Student's *t*-test (\*\*  $P < 0.01$ ).

619

620

621
